# Supplementary material
Source: MDPI journal article supplement (https://www.mdpi.com/2410-3888/7/2/69)
Supplement: s1 [file s1]

**Supplementary Table S1.** Detailed information of sequences used in phylogenetic tree construction

| Classification | Species                          | GenBank accession number |
|----------------|----------------------------------|--------------------------|
| AQP0           | <i>Homo sapiens</i>              | NP_036196.1              |
| AQP0           | <i>Xenopus tropicalis</i>        | NP_001090816.1           |
| AQP0           | <i>Danio rerio</i>               | NP_001003534.1           |
| AQP0           | <i>Mus musculus</i>              | NP_032626.2              |
| AQP0           | <i>Gallus gallus</i>             | NP_989597.1              |
| AQP1           | <i>Aplysia californica</i>       | XP_005111060.2           |
| AQP1           | <i>Mizuhopecten yessoensis</i>   | XP_021364227.1           |
| AQP1           | <i>Helix pomatia</i>             | AOS89753.1               |
| AQP1           | <i>Crassostrea hongkongensis</i> | AJF12150.1               |
| AQP1           | <i>Xenopus tropicalis</i>        | NP_001005829.1           |
| AQP1           | <i>Sinonovacula constricta</i>   | QIE08067.1               |
| AQP1           | <i>Mus musculus</i>              | NP_031498.1              |
| AQP1           | <i>Gallus gallus</i>             | NP_001034542.1           |
| AQP1           | <i>Danio rerio</i>               | NP_996942.1              |
| AQP1           | <i>Homo sapiens</i>              | CAQ51480.2               |
| AQP2           | <i>Homo sapiens</i>              | CAG46821.1               |
| AQP2           | <i>Gallus gallus</i>             | NP_001279001.1           |
| AQP2           | <i>Xenopus tropicalis</i>        | NP_001015749.1           |
| AQP2           | <i>Alligator sinensis</i>        | XP_006031788.1           |
| AQP2           | <i>Mus musculus</i>              | NP_033829.3              |
| AQP3           | <i>Xenopus tropicalis</i>        | NP_001016845.1           |
| AQP3           | <i>Mus musculus</i>              | NP_057898.2              |
| AQP3           | <i>Gallus gallus</i>             | XP_424500.3              |
| AQP3           | <i>Homo sapiens</i>              | AAP35863.1               |
| AQP3           | <i>Danio rerio</i>               | AAH44188.1               |
| AQP4           | <i>Homo sapiens</i>              | AAH22286.1               |
| AQP4           | <i>Mus musculus</i>              | AAC53155.1               |
| AQP4           | <i>Alligator sinensis</i>        | XP_006016458.1           |
| AQP4           | <i>Xenopus tropicalis</i>        | NP_001304775.1           |
| AQP4           | <i>Danio rerio</i>               | NP_001345242.1           |
| AQP5           | <i>Homo sapiens</i>              | CAG46819.1               |
| AQP5           | <i>Gallus gallus</i>             | CAH25504.2               |
| AQP5           | <i>Xenopus tropicalis</i>        | NP_001297041.1           |
| AQP5           | <i>Mus musculus</i>              | NP_033831.1              |
| AQP5           | <i>Alligator sinensis</i>        | XP_006031787.1           |
| AQP6           | <i>Homo sapiens</i>              | NP_001643.2              |
| AQP6           | <i>Rattus norvegicus</i>         | NP_071517.1              |
| AQP6           | <i>Mus musculus</i>              | NP_780296.1              |
| AQP6           | <i>Pelodiscus sinensis</i>       | XP_025044536.1           |
| AQP6           | <i>Anolis carolinensis</i>       | XP_003216981.1           |
| AQP7           | <i>Mus musculus</i>              | NP_031499.1              |

|       |                                   |                |
|-------|-----------------------------------|----------------|
| AQP7  | <i>Alligator mississippiensis</i> | KYO28822.1     |
| AQP7  | <i>Danio rerio</i>                | XP_021324432.1 |
| AQP7  | <i>Homo sapiens</i>               | NP_001305087.1 |
| AQP7  | <i>Gallus gallus</i>              | BAF76152.1     |
| AQP8  | <i>Homo sapiens</i>               | NP_001160.2    |
| AQP8  | <i>Gallus gallus</i>              | XP_414866.2    |
| AQP8  | <i>Danio rerio</i>                | NP_001073651.1 |
| AQP8  | <i>Mus musculus</i>               | NP_001102515.1 |
| AQP8  | <i>Alligator sinensis</i>         | XP_006027210.1 |
| AQP8  | <i>Crassostrea gigas</i>          | XP_011436665.1 |
| AQP8  | <i>Mizuhopecten yessoensis</i>    | XP_021373383.1 |
| AQP8  | <i>Pomacea canaliculata</i>       | XP_025088344.1 |
| AQP8  | <i>Aplysia californica</i>        | XP_005094214.1 |
| AQP8  | <i>Sinonovacula constricta</i>    | QIE08068.1     |
| AQP9  | <i>Mus musculus</i>               | BAB03271.1     |
| AQP9  | <i>Xenopus tropicalis</i>         | XP_002937719.1 |
| AQP9  | <i>Gallus gallus</i>              | XP_015134380.1 |
| AQP9  | <i>Alligator sinensis</i>         | XP_014377951.2 |
| AQP9  | <i>Homo sapiens</i>               | CAG46824.1     |
| AQP10 | <i>Homo sapiens</i>               | NP_536354.2    |
| AQP10 | <i>Alligator mississippiensis</i> | XP_019350010.1 |
| AQP10 | <i>Mus pahari</i>                 | XP_021052600.1 |
| AQP10 | <i>Gallus gallus</i>              | XP_015154084.1 |
| AQP10 | <i>Xenopus tropicalis</i>         | XP_017945847.1 |
| AQP11 | <i>Mus musculus</i>               | NP_780314.1    |
| AQP11 | <i>Gallus gallus</i>              | XP_015136364.2 |
| AQP11 | <i>Homo sapiens</i>               | NP_766627.1    |
| AQP11 | <i>Danio rerio</i>                | NP_001314822.1 |
| AQP11 | <i>Xenopus laevis</i>             | XP_018103357.1 |
| AQP11 | <i>Crassostrea virginica</i>      | XP_022310134.1 |
| AQP11 | <i>Crassostrea gigas</i>          | XP_019923893.1 |
| AQP11 | <i>Mizuhopecten yessoensis</i>    | XP_021370233.1 |
| AQP11 | <i>Biomphalaria glabrata</i>      | XP_013078791.1 |
| AQP11 | <i>Sinonovacula constricta</i>    | QIE08069.1     |
| AQP12 | <i>Anolis carolinensis</i>        | XP_003218407.1 |
| AQP12 | <i>Homo sapiens</i>               | NP_945349.1    |
| AQP12 | <i>Rattus norvegicus</i>          | NP_001102479.1 |
| AQP12 | <i>Gallus gallus</i>              | NP_001103149.1 |
| AQP12 | <i>Mus musculus</i>               | AAI07213.1     |

---
